# Supplementary material for: Ovulation Patterns Affect the Offspring Sex Ratios and Change With the Women’s Age
Source: Research Square preprint supplement (doi:10.21203/rs.3.rs-529136/v1), 2021-05-29
Supplement: Supplementary file 1 [file 567f4be5d81c277fe2f725fa.docx]

May 9, 2021

Prof. Sanni Yaya

Editor-in-Chief

Reproductive Health

This time we would like to submit a paper entitled “Ovulation patterns affect the offspring sex ratios and change with the women’s age” to your journal. This work is unique and original. We do hope our paper will be accepted in your journal.

Best wishes,

Misao Fukuda

M&K Health Institute

30-9 Kariya, Ako, Hyogo 678-0239

Japan

Tel: 81-791 43 5357

Fax: 81-791 45 1566
